# Supplementary material
Source: Springer Nature journal article supplement (https://www.springermedizin.de/resource/supplementary/13024_2014_578_MOESM1_ESM.pdf/9644420)

a

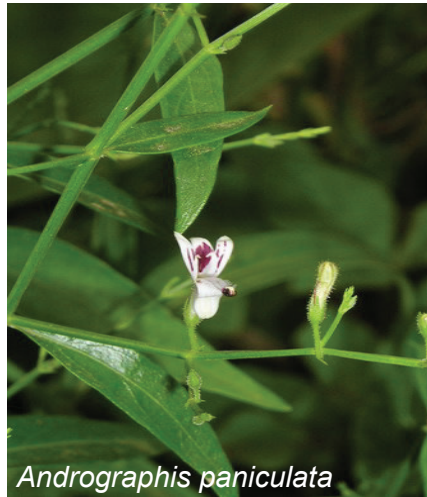

b

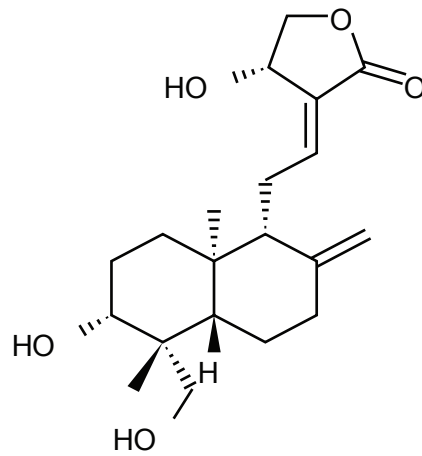

Supplement: MOESM1 [file 9644420]
